# Supplementary material for: pH and glutathione dual-triggered supramolecular assemblies as synergistic and controlled drug release carriers
Source: Royal Society of Chemistry journal article supplement (doi:10.1039/c7py01644a), 2017-01-01
Supplement: c7py01644a1.pdf [file c7py01644a1.pdf]

## Supporting information

pH, glutathione dual-triggered supramolecular assemblies as synergistic  
and controlled drug release carrier

Yang Kang<sup>a</sup>, Xin Ju<sup>b</sup>, Lu Wang<sup>a</sup>, Li-Sheng Ding<sup>a</sup>, Gui-Ting Liu<sup>b</sup>, Sheng Zhang<sup>b,\*</sup>, and Bang-Jing

Li<sup>a,\*</sup>

<sup>a</sup> Key Laboratory of Mountain Ecological Restoration and Bioresource Utilization, Chengdu Institute of Biology, Chinese Academy of Sciences, Chengdu 610041, China, Tel: +86-28-82890646. Fax: (+86)28-82890646. E-mail: libj@cib.ac.cn (B. Li);

<sup>b</sup> State Key Laboratory of Polymer Materials Engineering, Polymer Research Institute of Sichuan University, Sichuan University, Chengdu 610065, China, Tel, Fax: +86-28-85400266. E-mail: zslbj@163.com (S. Zhang).

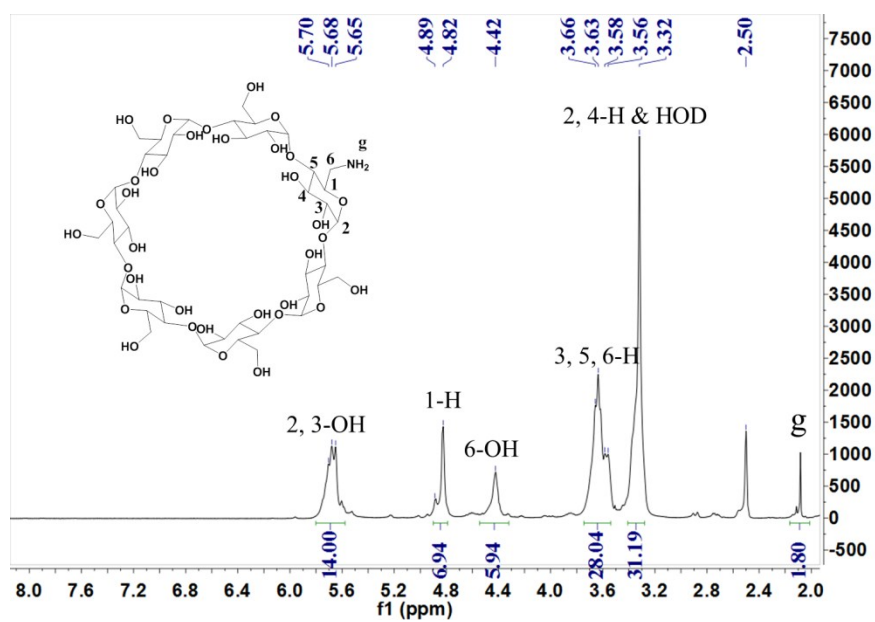

Fig. S1  $^1\text{H}$  NMR spectrum of  $\beta\text{-CD-NH}_2$  (solvent:  $\text{DMSO-d}_6$ ).

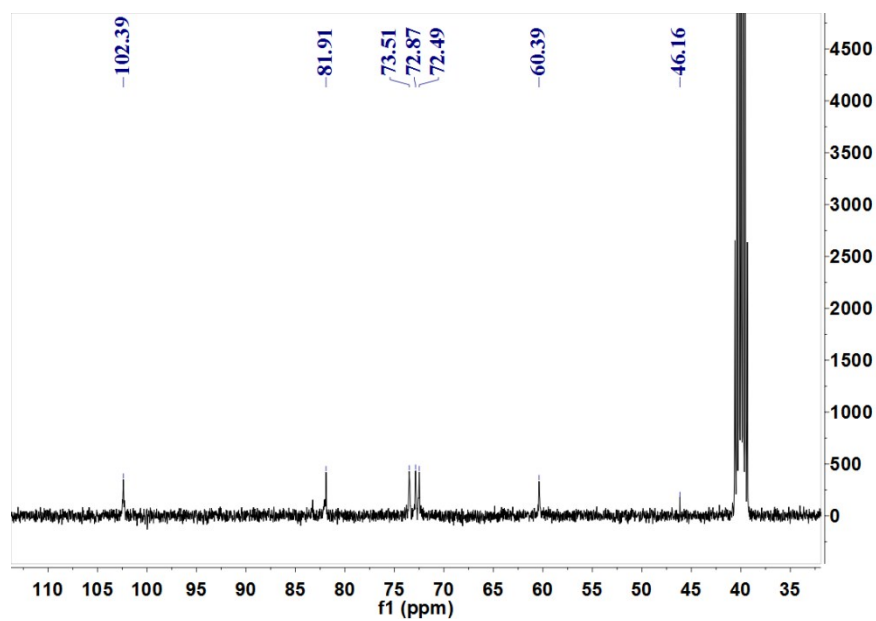

Fig. S2  $^{13}\text{C}$  NMR spectrum of  $\beta\text{-CD-NH}_2$  (solvent:  $\text{DMSO-d}_6$ ).

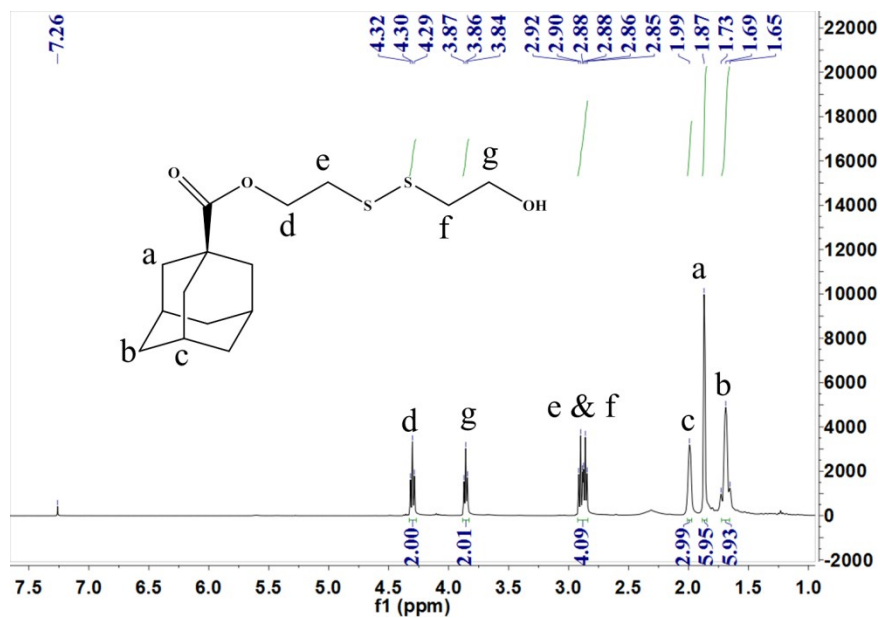

Fig. S3 <sup>1</sup>H NMR spectrum of ADA-SS-OH (solvent: CDCl<sub>3</sub>).

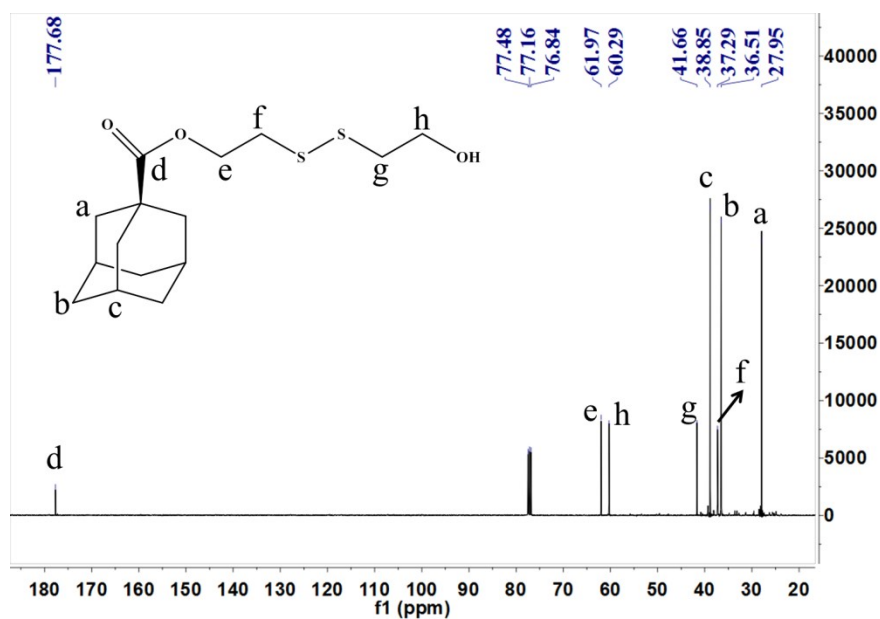

Fig. S4 <sup>13</sup>C NMR spectrum of ADA-SS-OH (solvent: CDCl<sub>3</sub>).

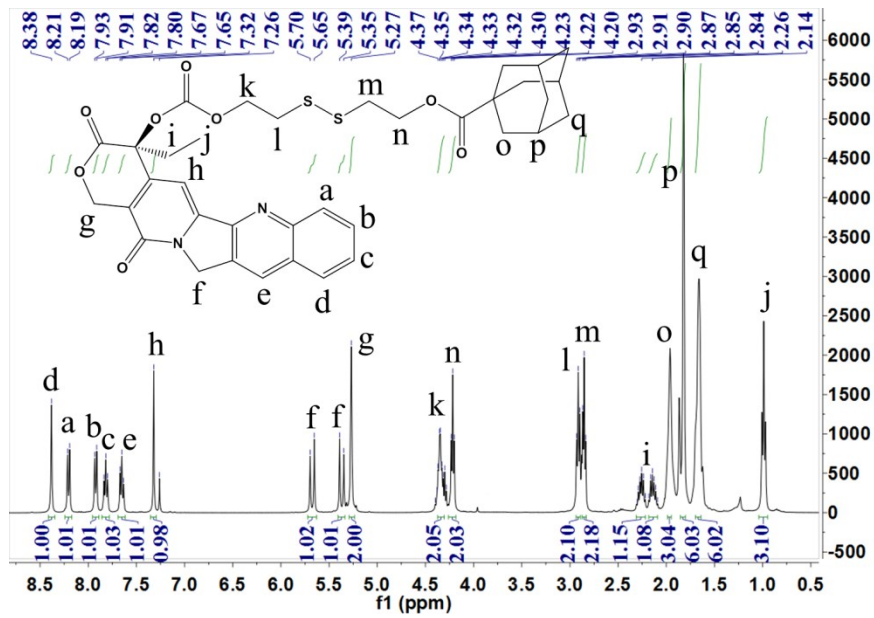

**Fig. S5**  $^1\text{H}$  NMR spectrum of ADA-CPT (solvent:  $\text{CDCl}_3$ ).

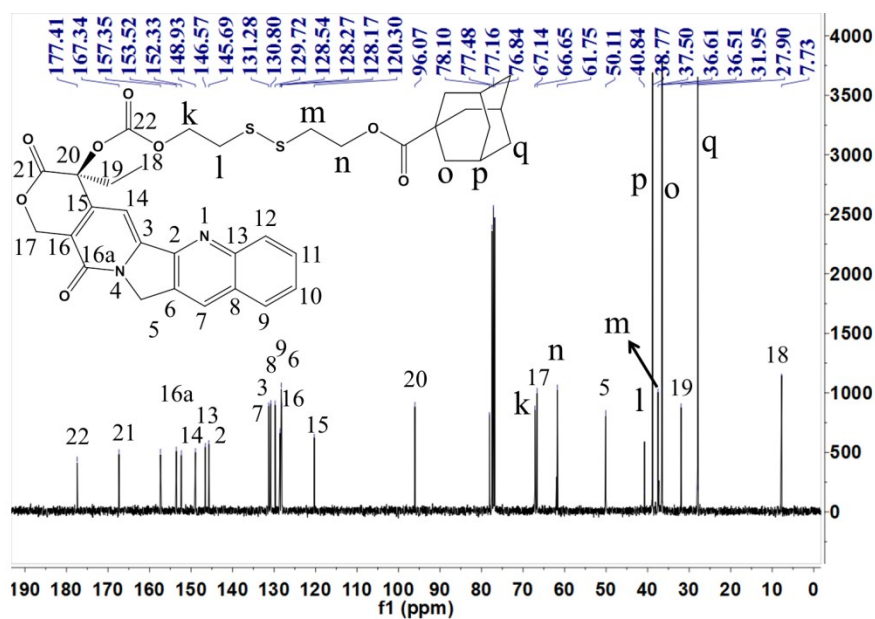

**Fig. S6**  $^{13}\text{C}$  NMR spectrum of ADA-CPT (solvent:  $\text{CDCl}_3$ ).

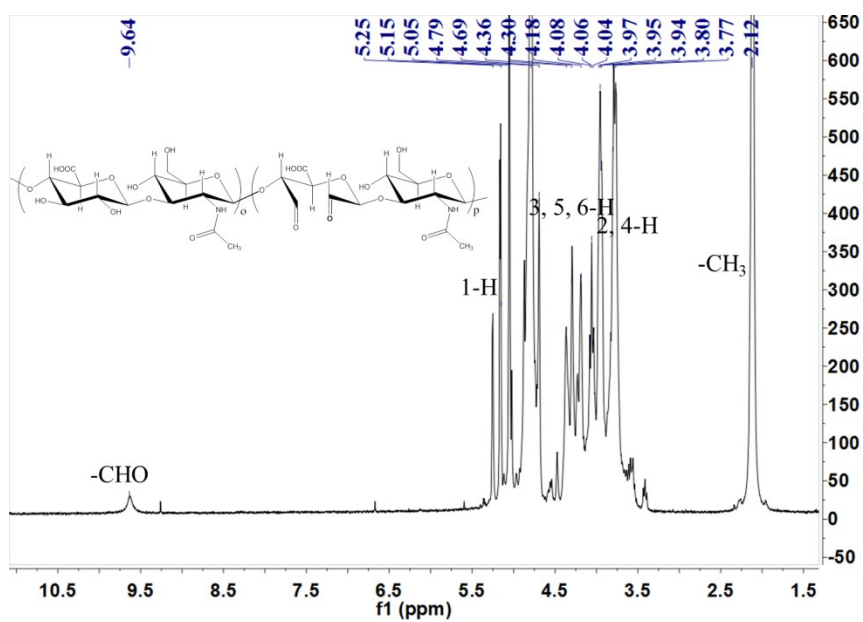

**Fig. S7**  $^1\text{H}$  NMR spectrum of OX-HA (solvent:  $\text{D}_2\text{O}$ ).

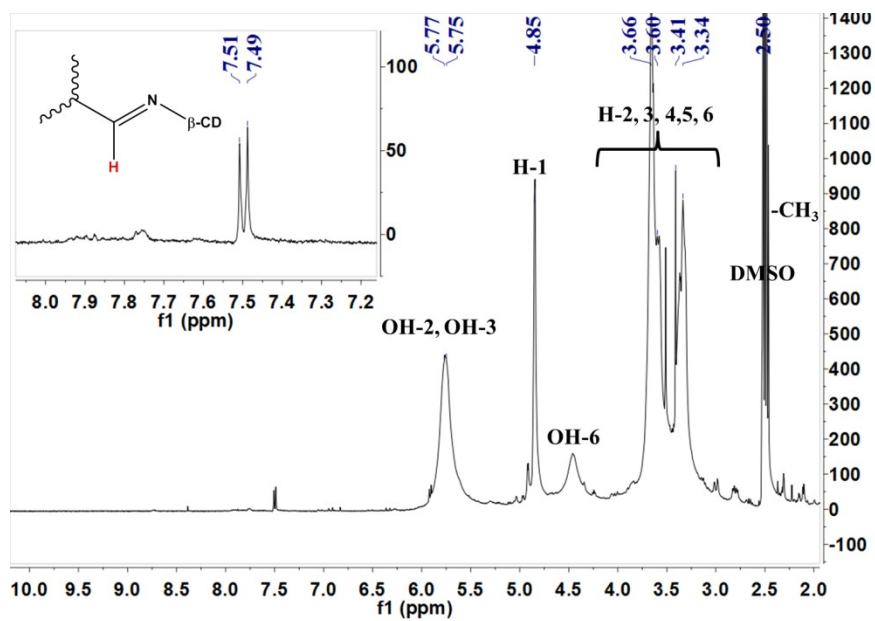

**Fig. S8** <sup>1</sup>H NMR spectrum of β-CD-g-OX-HA (solvent: DMSO-d<sub>6</sub>).

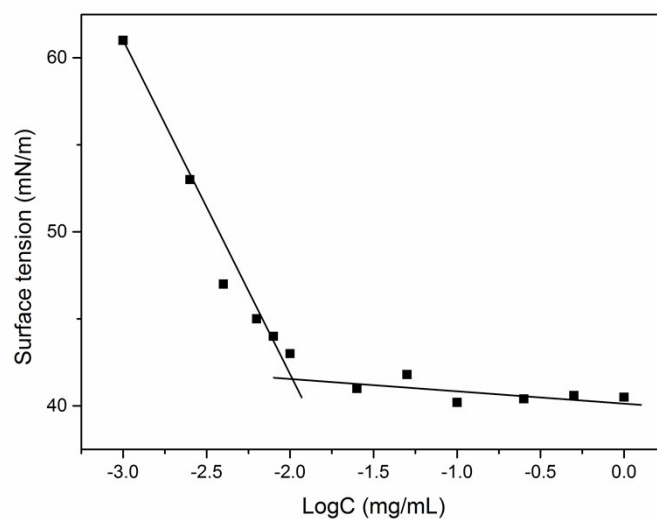

**Fig. S9** Plot of the surface tension of β-CD-g-OX-HA/ADA-CPT supramolecular inclusions micelles with different aqueous concentration at 25 °C.

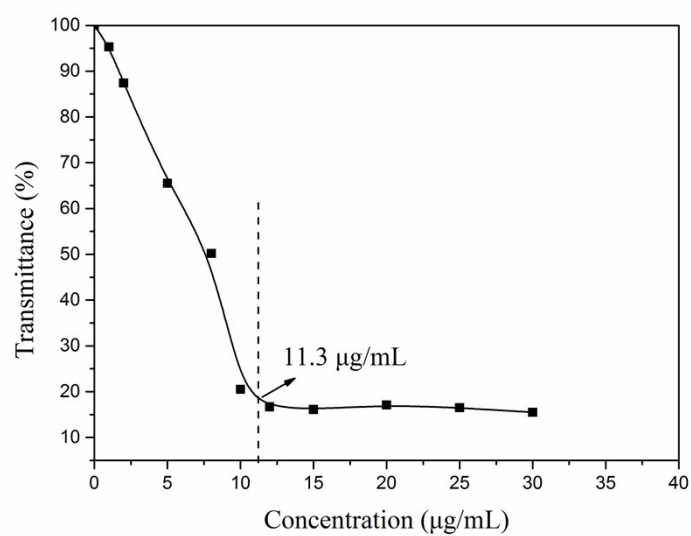

**Fig. S10** Determination of CMC for the  $\beta$ -CD-g-OX-HA/ADA-CPT supramolecular inclusions micelles by turbidity tests at 25 °C.
